# Supplementary material
Source: PubMed Central journal article supplement (PMC3302267)
Supplement: supp_86.5.2797_TableS1.pdf [file supp_86.5.2797_TableS1.pdf]

Supplementary Table. Primers used in this study

| Primer function   | Forward/reverse            | Primer name | Primer sequence (5' to 3')  |          |                         |
|-------------------|----------------------------|-------------|-----------------------------|----------|-------------------------|
| Screening         | Forward                    | LPW18665    | GGACCCGTGAATGCGGCTAA        |          |                         |
|                   | Reverse                    | LPW18666    | CACGGAACACCGAAAGTAGT        |          |                         |
| Genome sequencing | Forward                    | LPW06545    | CACCTCATCTTCTGYCAYTCYAA     |          |                         |
|                   |                            | LPW06546    | CAGTCAGTCACNGARTCRAA        |          |                         |
|                   |                            | LPW08433    | GATCAAGTGCCACAAACCA         |          |                         |
|                   |                            | LPW08434    | GTGGCTTGTGTAATGCGTA         |          |                         |
|                   |                            | LPW08730    | CCCTGGATCAAGTGCTCACAA       |          |                         |
|                   |                            | LPW08731    | AACCAGTGAGTGGCTTGTGTA       |          |                         |
|                   |                            | LPW08817    | GTATGTTGGAGAATTGACACCAT     |          |                         |
|                   |                            | LPW08818    | GGAATGGTAAGGCTGTGAGTT       |          |                         |
|                   |                            | LPW08829    | GAGATTATCATTGCTACAGCTA      |          |                         |
|                   |                            | LPW08830    | GATACTGCATCCCGTGAT          |          |                         |
|                   |                            | LPW08843    | TGATGGTAAGCTTACTGATCTA      |          |                         |
|                   |                            | LPW08844    | TTGAAGTTCCTCGTAAGTACTT      |          |                         |
|                   |                            | LPW08876    | TAAATAGATTGCTTGGTGGTGAT     |          |                         |
|                   |                            | LPW09574    | TGTTACCCTTGAAGGTGTGAGAA     |          |                         |
|                   |                            | LPW09575    | GAAGGTGGGTGAAGTTCCAA        |          |                         |
|                   |                            | LPW09715    | AGAAAATGTCTGTGGCTGCTA       |          |                         |
|                   |                            | LPW09716    | AGTTACTTTAGTCAATGGTCTA      |          |                         |
|                   |                            | LPW09719    | TGGTTCAATCCCTCTTGCTCTT      |          |                         |
|                   |                            | LPW09720    | CTTGCTGACCTTCTCTGCGAGTT     |          |                         |
|                   |                            | LPW10025    | TGTGGTTCCTGTTGTCTC          |          |                         |
|                   |                            | LPW10026    | GGTGAAGTTCCAACCCATT         |          |                         |
|                   |                            | LPW10040    | CTGATTAATGATACCGCCACC       |          |                         |
|                   |                            | LPW10041    | GTCCCTATGATTGCTCTATATG      |          |                         |
|                   |                            | LPW10042    | GTTGCCTTGCATGAGATGATTC      |          |                         |
|                   |                            | LPW10265    | TAAAGGCTGGTAAGACCCGTG       |          |                         |
|                   |                            | LPW10433    | ACAAGATGCGTGAGAAGGCAC       |          |                         |
|                   |                            | LPW10460    | TGCCATCTGGTTGTGCTGG         |          |                         |
|                   |                            | LPW10461    | TTGCTTCATGGACTTGGAAACC      |          |                         |
|                   |                            | LPW10478    | GCTTTCACCACGGTCTCG          |          |                         |
|                   |                            | LPW10479    | GGACATCTGTGAGGAGCGGAA       |          |                         |
|                   |                            | LPW10590    | GGACCTACCTGAAATGAGTAAAATGC  |          |                         |
|                   |                            | LPW10591    | AGTAAAATGCTCAGGGAAGTGTG     |          |                         |
|                   |                            | LPW10648    | CTTATGAGTATTGTGGGAGAACCGCTA |          |                         |
|                   |                            | LPW10720    | CCTCTAGCCTTTGATAGTCAAGTTGC  |          |                         |
|                   |                            | LPW10924    | CTGCGTGTGTCTCGTAAATGGAATCT  |          |                         |
|                   |                            | LPW10951    | ATACTTCGCTACTGGACTTCCCTTTG  |          |                         |
|                   |                            | LPW11540    | CTCCCTGGTGAAGTTATGACATCTAC  |          |                         |
|                   |                            | LPW13179    | GACGACAAAAGATGCTTAGTCCAC    |          |                         |
|                   |                            | Reverse     | Reverse                     | LPW08727 | TTACGACAAGCCACTCACTGGTT |
|                   |                            |             |                             | LPW08728 | CCAGACTTGC GCGTTACGACAA |
| LPW08729          | GTCCCATCCCAGACTT           |             |                             |          |                         |
| LPW08732          | TACGACAAGCCACCCACTGGTT     |             |                             |          |                         |
| LPW08733          | CCCAGACTTACGCATTACGACAA    |             |                             |          |                         |
| LPW08734          | GGTCCCATCCCAGACTT          |             |                             |          |                         |
| LPW08815          | TGATCTCATCAAGAAGCCACAT     |             |                             |          |                         |
| LPW08816          | CTTAGGGGTATCCTCGACTT       |             |                             |          |                         |
| LPW08827          | CACAACCAGGTTTCCCATGAA      |             |                             |          |                         |
| LPW08828          | GCTCAGCAGAGGCAAGAGAT       |             |                             |          |                         |
| LPW08877          | TCGAGCAATCTTCTCAGCAA       |             |                             |          |                         |
| LPW08878          | TTAGCGGCGATAATTGCAA        |             |                             |          |                         |
| LPW08879          | GAGCTCACCAGTTCTAGTT        |             |                             |          |                         |
| LPW09571          | AGCAAACATGCCAGCCAGACCCAGTA |             |                             |          |                         |
| LPW09572          | GAAACAACCTTAGTAACATCAA     |             |                             |          |                         |

|                     |         |          |                                |
|---------------------|---------|----------|--------------------------------|
|                     |         | LPW09573 | AGGTGAATTTTATGCCACCATAACCATC   |
|                     |         | LPW09714 | AGGAAACACGGAACACCGAAAAGTAG     |
|                     |         | LPW09717 | TTTCGGCAAACCATCTTTCCAT         |
|                     |         | LPW09718 | CCAGAGGCTTGTTGAGGTCAA          |
|                     |         | LPW10018 | CGAGTCTCATTCTCGGTTTCTTCCT      |
|                     |         | LPW10019 | GCAGACAAGTCTCCATGTCACCATG      |
|                     |         | LPW10020 | CTCGGAGTCAGGGTAGCGGTTCT        |
|                     |         | LPW10027 | GCGGGTGGTCATGGCAC              |
|                     |         | LPW10048 | ATACACTCCAACGGCAGT             |
|                     |         | LPW10049 | CGGCAGTCGGCTCTTCGTATCCA        |
|                     |         | LPW10050 | TCCTCGGAGTCAGGGTAGCGGTTCT      |
|                     |         | LPW10644 | ATGGGAACCTTGGTGTAAATCAATCCTG   |
|                     |         | LPW10645 | GAGCATATCAGGGGAGGTGAATTGA      |
|                     |         | LPW10646 | TGTGGTTGACCGTCTTCATTTGAGG      |
|                     |         | LPW10647 | CTTGGGATTTCAAGGGTTTTCC         |
|                     |         | LPW10649 | TTGGCATAATAAGCGGGAGC           |
|                     |         | LPW10650 | GTTAGCAAAGGCGGCATCAA           |
|                     |         | LPW10651 | CAGTTGTCCCAGTCACGATAGGT        |
|                     |         | LPW10713 | AGTTGGTGGATTAAGGAACCTGTCCG     |
|                     |         | LPW10714 | TTCATATTCAGTTAGGTTAGCACTGCGGG  |
|                     |         | LPW10716 | AGTAGGCACATAGGTGGTAGGAGCAG     |
|                     |         | LPW10719 | GAAACACTAGGATACATAGGTAAAGC     |
|                     |         | LPW10721 | GGATTGGGTACGGTAGTTGGTTCA       |
|                     |         | LPW10722 | CGCTTACAGCTCCACGGTCA           |
|                     |         | LPW10923 | TCGCACTCTATGGTTTGGGTGTCTTC     |
|                     |         | LPW10925 | AACCCTCAACCACCTGTACGG          |
|                     |         | LPW11046 | TCGGCTTAGAGTTATACAAAGGGTTGACAG |
|                     |         | LPW11541 | CACCTGTATACTGAGAAAAGAAGCG      |
| Quantitative RT-PCR | Forward | LPW15036 | CCGACCAACATCTCATGTGCG          |
|                     | Reverse | LPW15037 | CCCGGAGGAATTCTGGGTTA           |
|                     | Probe   | LPW15038 | FAM-CTGGATGATCTTTTAAGACTC-BHQ1 |

---
